# Supplementary material for: Excimer formation by interstrand stacked pyrenes
Source: Royal Society of Chemistry journal article supplement (doi:10.1039/b412831a), 2004-01-01

Supplementary Information to:

**Excimer Formation by Interstrand Stacked Pyrenes**

Simon M. Langegger and Robert Häner\*

Department of Chemistry and Biochemistry, University of Bern

Freiestrasse 3, CH-3012 Bern, Switzerland

(phone: +41 31 631 4382; e-mail: [robert.haener@ioc.unibe.ch](mailto:robert.haener@ioc.unibe.ch))

## Experimental Section

**General.** Chemicals, solvents, and reagents for reactions were from *Acros*, *Aldrich*, or *Fluka*, and were of the highest quality available. Solvents for extraction and chromatography were of technical grade and distilled prior to use. Thin layer chromatography (TLC): silica-gel 60  $F_{254}$  glass plates (*Merck*); visualisation by UV and/or A) by dipping in a soln. of anisaldehyde (10 ml), conc.  $H_2SO_4$  (10 ml), and AcOH (2 ml) in EtOH (180 ml) or B) cerium (IV) sulfate (3mM)/ammonium molybdate (250mM in aq.  $H_2SO_4$  (10%)) followed by heating. Flash column chromatography (CC): silica gel 60 (40-63  $\mu m$ , 230-400 mesh, *Fluka*) at low pressure. The chromatography of acid sensitive compounds was carried out with eluent containing 2%  $NEt_3$ .  $^1H$ - and  $^{13}C$ -NMR: *Bruker AC-300* or *Bruker AMX 400*,  $\delta$  values in ppm (solvents signals as internal standards),  $J$  [Hz];  $^{31}P$ -NMR: *Bruker AC-300*,  $\delta$  values in ppm (85%  $H_3PO_4$  as external standard). ESI-MS: *VG Platform* single quadrupole ESI mass spectrometer. DMT: 4,4'-dimethoxytrityl; BOP: Benzotriazol-1-yloxy)-tris-(dimethylamino)-phosphonium-hexafluorophosphate; AcOEt: ethyl acetate; r.t: room temperature; HR-ESI-MS: high resolution ESI-MS.

## General Procedures

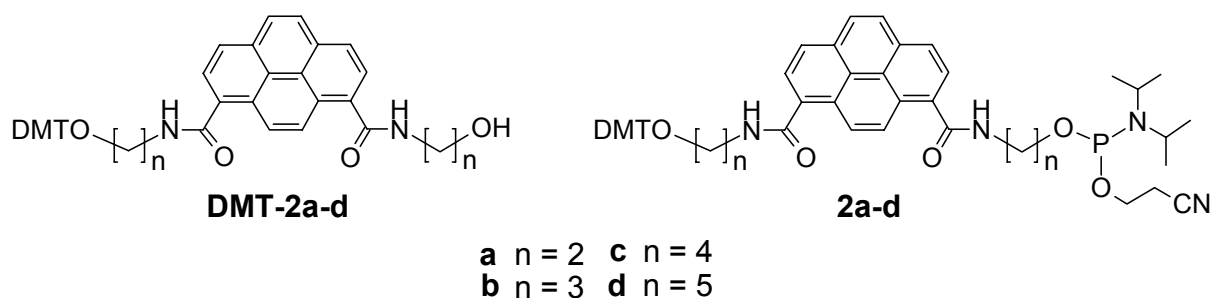

### Preparation of the intermediates DMT-2a-d

1 eq. pyrene-1,8-dicarboxylic acid and 5 eq. *Hünig's* base were solved in dry DMF (concentration of the acid 0.2M), then a solution of 1 eq.  $HO(CH_2)_nNH_2$  and 1 eq.  $DMTO(CH_2)_nNH_2$  in dry pyridine (concentration of the DMT protected linker 0.5M) was added at r.t.. After this 2.2 eq of BOP was added and stirred under  $N_2$  atmosphere for 1h. The mixture was diluted with AcOEt washed with 10% aq. citric acid and sat. aq  $NaHCO_3$  soln. The org. layer was dried ( $K_2CO_3$ ) and evaporated under reduced pressure. Purification of the resulting oil by CC (silica gel;  $CH_2Cl_2 \rightarrow CH_2Cl_2$ : MeOH (98: 2) (+2%  $Et_3N$ )) furnished as yellow foam.

### Preparation of phosphoramidites 2a-d

1 eq. of the DMT protected pyrene was solved in dry  $CH_2Cl_2$  and 3 eq. *Hünig's* base. Then 1 eq. of 2-cyanoethyl diisopropylamidochloridophosphite under  $N_2$  atmosphere was added and stirred for 1 h at r.t.. The reaction mixture was directly purified by CC (silica gel;  $CH_2Cl_2 \rightarrow CH_2Cl_2$ : MeOH (98:2)(+ 2%  $Et_3N$ )). Compounds **2a-d** were obtained as yellow foams.

Pyrene-1,8-dicarboxylic acid 1-({2-[(4,4'-dimethoxytrityl)-oxy]-ethyl}-amide) 8-[(2-hydroxyethyl)-amide] (**DMT-2a**). Yield: 28%, yellow foam. TLC (AcOEt):  $R_f$  0.25

<sup>1</sup>H-NMR(300MHz,CDCl<sub>3</sub>): 3.47 (*t*, *J* = 4.7, ROCH<sub>2</sub>); 3.7-3.85 (*m*, CH<sub>2</sub>N, CH<sub>2</sub>N'); 3.72 (*s*, 2MeO); 3.97 (*m*, CH<sub>2</sub>OH); 6.79 (*d*, 4 arom. H); 7.15-8.1 (*m*, 15 arom. H); 8.25 (*m*, 2H). ESI-MS (*pos. mode*): 701[M+Na]<sup>+</sup>

Pyrene-1,8-dicarboxylic acid 1-({3-[(4,4'dimethoxytrityl)-oxy]-propyl}-amide) 8-[(2-hydroxy-propyl)-amide] (**DMT-2b**). Yield: 22%, yellow foam. TLC (AcOEt): *R<sub>f</sub>* 0.25  
<sup>1</sup>H-NMR(300MHz,CDCl<sub>3</sub>): 1.95 (*m*, 2 CH<sub>2</sub>CH<sub>2</sub>CH<sub>2</sub>); 3.33 (*t*, *J* = 5.4, ROCH<sub>2</sub>); 3.55 (*s*, 2MeO); 3.7-3.9 (*m*, CH<sub>2</sub>N, CH<sub>2</sub>N', CH<sub>2</sub>OH); 6.59 (*d*, 4 arom. H); 7.0-7.8 (*m*, 15 arom. H); 8.25 (*m*, 2H). ESI-MS (*pos. mode*): 729[M+Na]<sup>+</sup>

Pyrene-1,8-dicarboxylic acid 1-({4-[(4,4'dimethoxytrityl)-oxy]-butyl}-amide) 8-[(2-hydroxy-butyl)-amide] (**DMT-2c**). Yield: 20%, yellow foam. TLC (AcOEt): *R<sub>f</sub>* 0.27  
<sup>1</sup>H-NMR(300MHz,CDCl<sub>3</sub>): 1.81 (*m*, 2 CH<sub>2</sub>CH<sub>2</sub>CH<sub>2</sub>CH<sub>2</sub>); 3.14 (*m*, ROCH<sub>2</sub>); 3.70 (*s*, 2MeO); 3.5-3.8 (*m*, CH<sub>2</sub>N, CH<sub>2</sub>N', CH<sub>2</sub>OH); 6.70 (*d*, 4 arom. H); 7.1-8.0 (*m*, 15 arom. H); 8.29 (*m*, 2H). ESI-MS (*pos. mode*): 757[M+Na]<sup>+</sup>

Pyrene-1,8-dicarboxylic acid 1-({5-[(4,4'dimethoxytrityl)-oxy]-pentyl}-amide) 8-[(2-hydroxy-pentyl)-amide] (**DMT-2d**). Yield: 17%, yellow foam. TLC (AcOEt): *R<sub>f</sub>* 0.36  
<sup>1</sup>H-NMR(300MHz,CDCl<sub>3</sub>): 1.69 (*m*, 2 CH<sub>2</sub>CH<sub>2</sub>CH<sub>2</sub>CH<sub>2</sub>CH<sub>2</sub>); 3.11 (*m*, ROCH<sub>2</sub>); 3.73 (*s*, 2MeO); 3.5-3.8 (*m*, CH<sub>2</sub>N, CH<sub>2</sub>N', CH<sub>2</sub>OH); 6.79 (*d*, 4 arom. H); 7.1-8.0 (*m*, 15 arom. H); 8.23 (*m*, 2H). ESI-MS (*pos. mode*): 785[M+Na]<sup>+</sup>

Diisopropyl-phosphoramidous acid 2-[(8-{2-[bis-(4,4'dimethoxytrityl)-oxy]-ethylcarbamoyl}-pyrene-1-carbonyl)-amino]-ethyl ester 2-cyano-ethyl ester (**2a**). Yield: 81%, yellow foam. TLC (AcOEt:hexane 6:4 + 2% Et<sub>3</sub>N): *R<sub>f</sub>* 0.22  
<sup>1</sup>H-NMR(300MHz,CDCl<sub>3</sub>): 1.17 (*d*, *J* = 6.9, 2 MeCHN); 2.46 (*t*, *J* = 6.2, CH<sub>2</sub>CN); 3.4-4.0 (*m*, CH<sub>2</sub>CH<sub>2</sub>N, CH<sub>2</sub>CH<sub>2</sub>N', OCH<sub>2</sub>CH<sub>2</sub>CN, 2 Me<sub>2</sub>CHN); 3.73 (*s*, 2MeO); 6.79 (*d*, 4 arom. H); 7.1-7.5 (*m*, 9 arom. H); 8.0-8.3(*m*, 6 arom. H); 8.64 (*m*, 2H). <sup>31</sup>P-NMR(162MHz, CDCl<sub>3</sub>): 148.79. HR-ESI-MS (*pos. mode*): 901.3701 ([M+Na]<sup>+</sup>; calc. 901.3706)

Diisopropyl-phosphoramidous acid 2-[(8-{3-[bis-(4,4'dimethoxytrityl)-oxy]-propylcarbamoyl}-pyrene-1-carbonyl)-amino]-propyl ester 2-cyano-ethyl ester (**2b**). Yield: 43%, yellow foam. TLC (AcOEt:hexane 6:4 + 2% Et<sub>3</sub>N): *R<sub>f</sub>* 0.24  
<sup>1</sup>H-NMR(300MHz,CDCl<sub>3</sub>): 1.03, 1.04 (*2d*, *J* = 6.8, 2 MeCHN); 2.03 (*m*, 2 CH<sub>2</sub>CH<sub>2</sub>CH<sub>2</sub>); 2.35 (*m*, CH<sub>2</sub>CN); 3.3-3.9 (*m*, CH<sub>2</sub>CH<sub>2</sub>CH<sub>2</sub>N, CH<sub>2</sub>CH<sub>2</sub>CH<sub>2</sub>N', OCH<sub>2</sub>CH<sub>2</sub>CN, 2 Me<sub>2</sub>CHN); 3.58 (*s*, 2MeO); 6.59 (*d*, 4 arom. H); 7.0-7.4 (*m*, 9 arom. H); 7.9-8.25(*m*, 6 arom. H); 8.59 (*m*, 2H). <sup>31</sup>P-NMR(162MHz, CDCl<sub>3</sub>): 148.24. HR-ESI-MS (*pos. mode*): 925.4536 ([M+Na]<sup>+</sup>; calc. 925.4543)

Diisopropyl-phosphoramidous acid 2-[(8-{4-[bis-(4,4'dimethoxytrityl)-oxy]-butylcarbamoyl}-pyrene-1-carbonyl)-amino]-butyl ester 2-cyano-ethyl ester (**2c**). Yield: 61%, yellow foam. TLC (AcOEt:hexane 6:4 + 2% Et<sub>3</sub>N): *R<sub>f</sub>* 0.42  
<sup>1</sup>H-NMR(300MHz,CDCl<sub>3</sub>): 1.04, 1.05 (*2d*, *J* = 6.6, 2 MeCHN); 1.82 (*m*, 2 CH<sub>2</sub>CH<sub>2</sub>CH<sub>2</sub>CH<sub>2</sub>); 2.50 (*t*, *J* = 6.3, CH<sub>2</sub>CN); 3.1-3.8 (*m*, CH<sub>2</sub>CH<sub>2</sub>CH<sub>2</sub>CH<sub>2</sub>N, CH<sub>2</sub>CH<sub>2</sub>CH<sub>2</sub>CH<sub>2</sub>N', OCH<sub>2</sub>CH<sub>2</sub>CN,

2 Me<sub>2</sub>CHN); 3.70 (*s*, 2MeO); 6.71 (*d*, 4 arom. H); 7.1-7.5 (*m*, 9 arom. H); 7.9-8.25(*m*, 6 arom. H); 8.57 (*m*, 2H). <sup>31</sup>P-NMR(162MHz, CDCl<sub>3</sub>): 147.71. ESI-MS (*pos. mode*): 952 [*M*+NH<sub>4</sub>]<sup>+</sup>

Diisopropyl-phosphoramidous acid 2-[(8-{5-[bis-(4,4'-dimethoxytrityl)-oxy]-pentylcarbamoyl}-pyrene-1-carbonyl)-amino]-pentyl ester 2-cyano-ethyl ester (**2d**). Yield: 68%, yellow foam. TLC (AcOEt:hexane 6:4 + 2% Et<sub>3</sub>N): *R<sub>f</sub>* 0.94.

<sup>1</sup>H-NMR(300MHz,CDCl<sub>3</sub>): 1.17, 1.18 (*2d*, *J* = 6.7, 2 MeCHN); 1.72 (*m*, 2 CH<sub>2</sub>CH<sub>2</sub>CH<sub>2</sub>CH<sub>2</sub>CH<sub>2</sub>); 2.63 (*m*, CH<sub>2</sub>CN); 3.0-3.9 (*m*, CH<sub>2</sub>CH<sub>2</sub>CH<sub>2</sub>CH<sub>2</sub>CH<sub>2</sub>N, CH<sub>2</sub>CH<sub>2</sub>CH<sub>2</sub>CH<sub>2</sub>CH<sub>2</sub>N', OCH<sub>2</sub>CH<sub>2</sub>CN, 2 Me<sub>2</sub>CHN); 3.77 (*s*, 2MeO); 6.81 (*d*, 4 arom. H); 7.1-7.5 (*m*, 9 arom. H); 7.9-8.25(*m*, 6 arom. H); 8.55 (*m*, 2H). <sup>31</sup>P-NMR(162MHz, CDCl<sub>3</sub>): 147.35. HR-ESI-MS (*pos. mode*): 963.4828 ([*M*+Na]<sup>+</sup>; calc. 963.4825)

### Oligonucleotide Synthesis

Pyrene-derived phosphoramidite building blocks **2a-d** were incorporated into oligonucleotides *via* standard automated oligonucleotide synthesis using I<sub>2</sub>/pyridine/water in the oxidation step. Coupling yields with **2a-d** were equal to the ones obtained with standard phosphoramidite building blocks. Oligonucleotides were purified by reverse phase HPLC and characterised by MS (Table 1).

**Table 1 suppl.:** Molecular weights of oligonucleotides used in this study (*electrospray ionisation time-of-flight, ESI-TOF*)

| oligonucleotide | calculated for (M-H) <sup>-</sup> | found  |
|-----------------|-----------------------------------|--------|
| <b>3a</b>       | 6604.5                            | 6604.4 |
| <b>3b</b>       | 6632.5                            | 6632.6 |
| <b>3c</b>       | 6660.5                            | 6660.5 |
| <b>3d</b>       | 6688.5                            | 6688.6 |
| <b>4a</b>       | 6506.5                            | 6506.5 |
| <b>4b</b>       | 6534.5                            | 6534.4 |
| <b>4c</b>       | 6562.5                            | 6562.4 |
| <b>4d</b>       | 6590.5                            | 6590.3 |

**Figure 1 suppl.:** Circular dichroism curve of hybrid **3d\*4d**. Conditions: 1.0  $\mu$ M oligomers (each strand); 100mM NaCl; 10mM Tris.HCl, pH 7.4, 20°C.

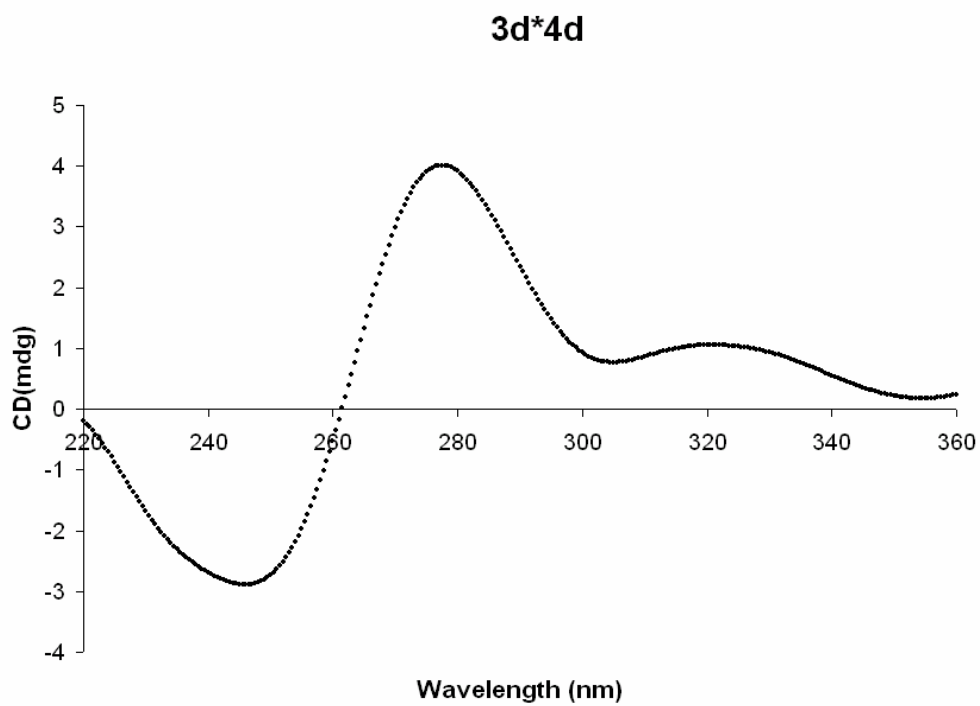

**Figure 2 suppl.:** Melting curves of different hybrids. Conditions: Oligomer concentration 1.0  $\mu\text{M}$ , 10 mM Tris-HCl, 100 mM NaCl, pH 7.4; temp. gradient:  $0.5^\circ\text{C}/\text{min}$ . Exptl. error:  $\pm 0.5^\circ\text{C}$ . Absorbance was measured at 260nm. **A)** duplex **5\*6**, **B)** duplex **3a\*4a**; **C)** duplex **3b\*4b**; **D)** duplex **3c\*4c**; **E)** duplex **3d\*4d**.

**A)**

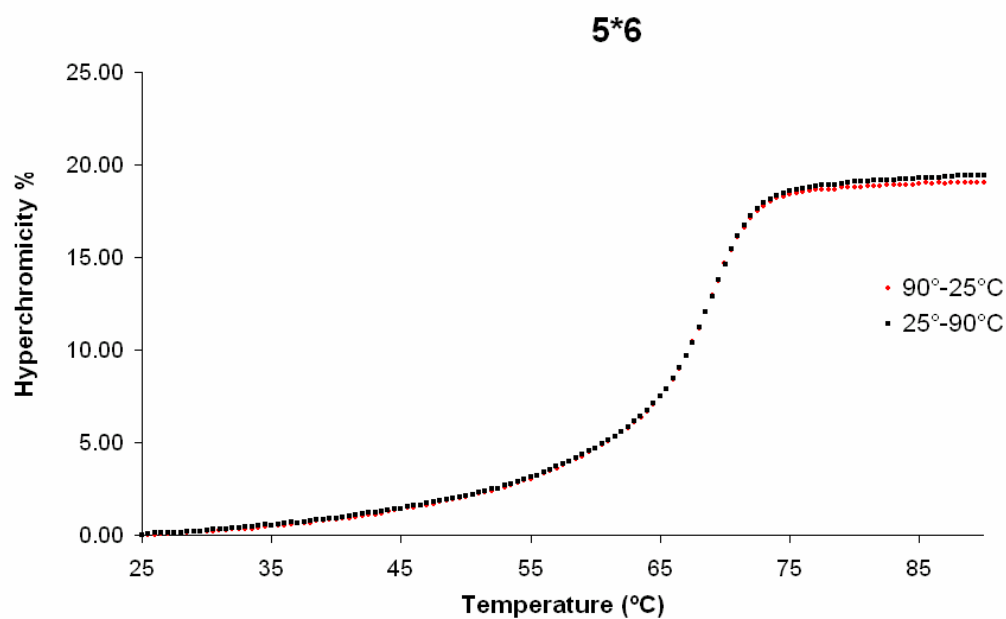

**B)**

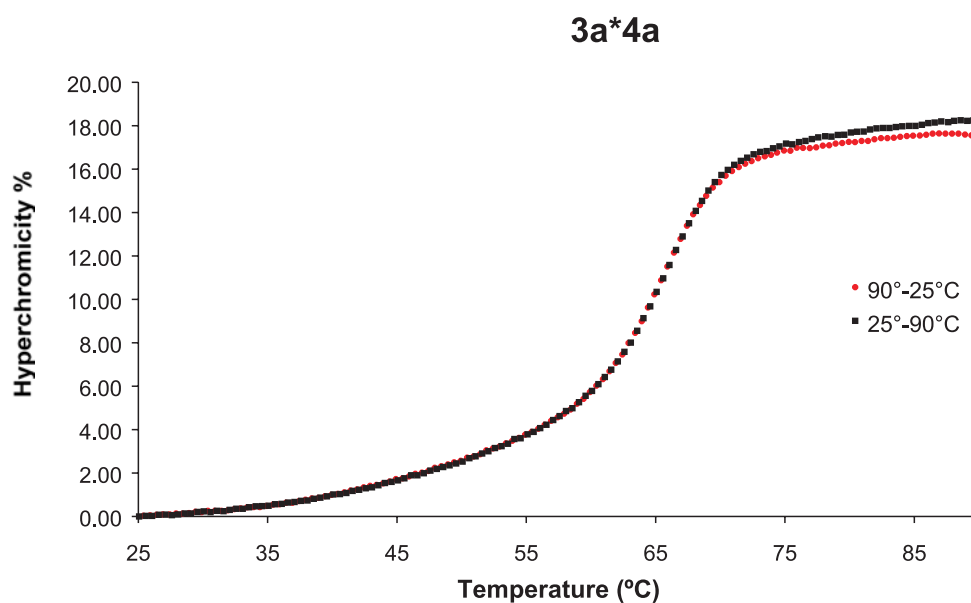

C)

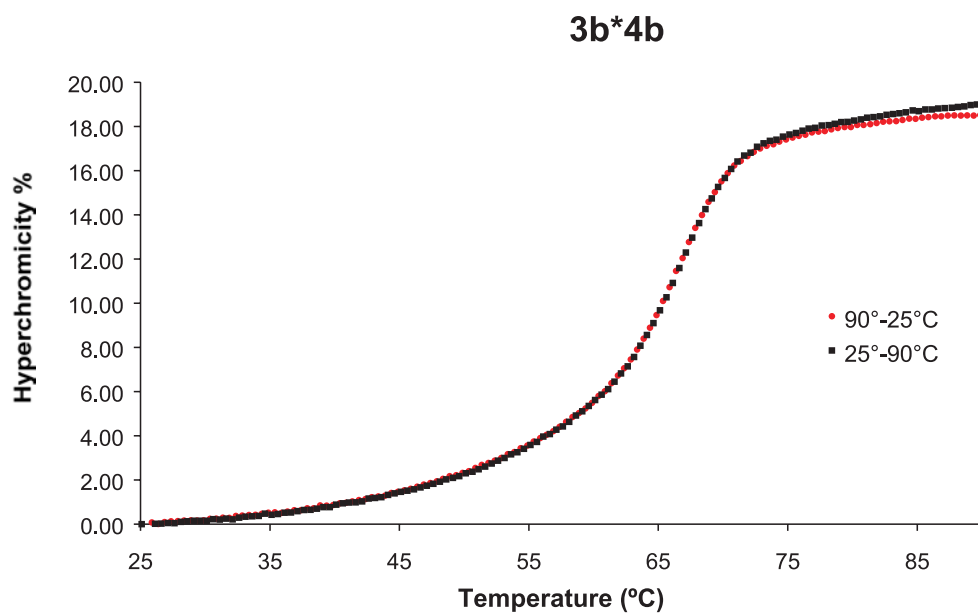

D)

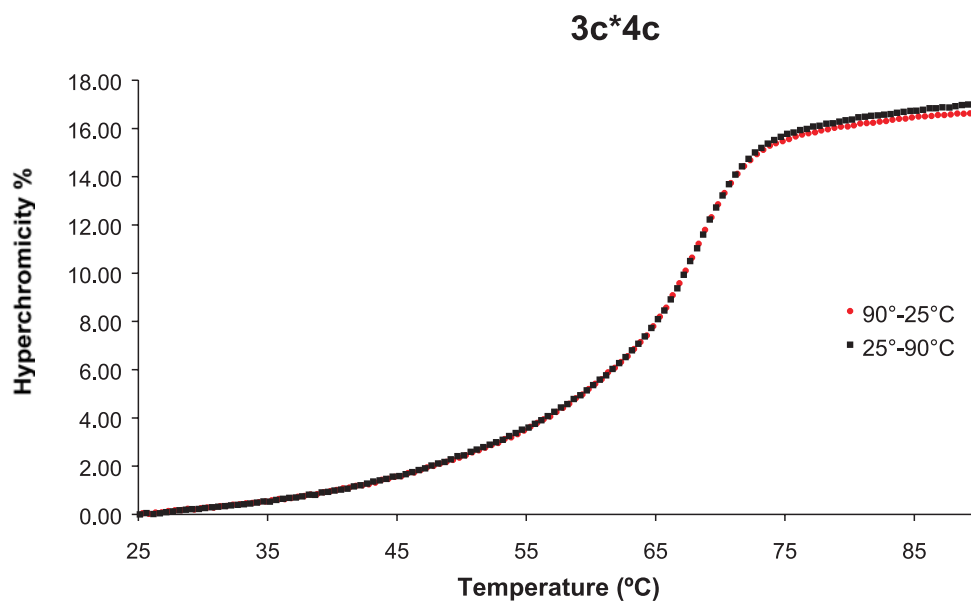

E)

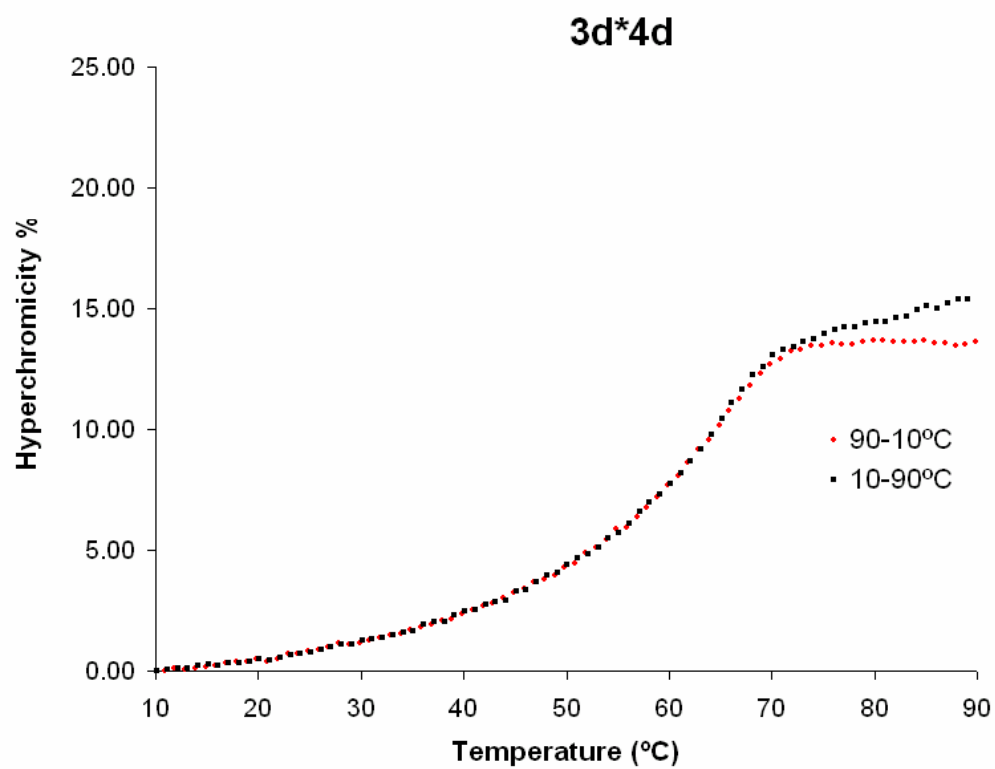

Supplement: b412831a.pdf [file b412831a.pdf]
